# Supplementary material
Source: PubMed Central journal article supplement (PMC6338585)
Supplement: Supp_Data.pdf [file Supp_Data.pdf]

## Supplementary Data

Model-estimated brain-skull displacements at neutral density target (NDT) locations were compared with the measurements in six cadaveric impacts (Figs. A1–A6). For consistency with the previous version of WHIM<sup>11,46</sup>, we reported the correlation score (CS) based on Normalized Integral Square Error

(NISE)<sup>71</sup>, as well as the CORrelation and Analysis (CORA) metric in order to compare performances with other head injury models<sup>43</sup> (Tables A1–A6, summarized in Table A7). CS and CORA scores for the *in vivo* case are summarized in Table A8.

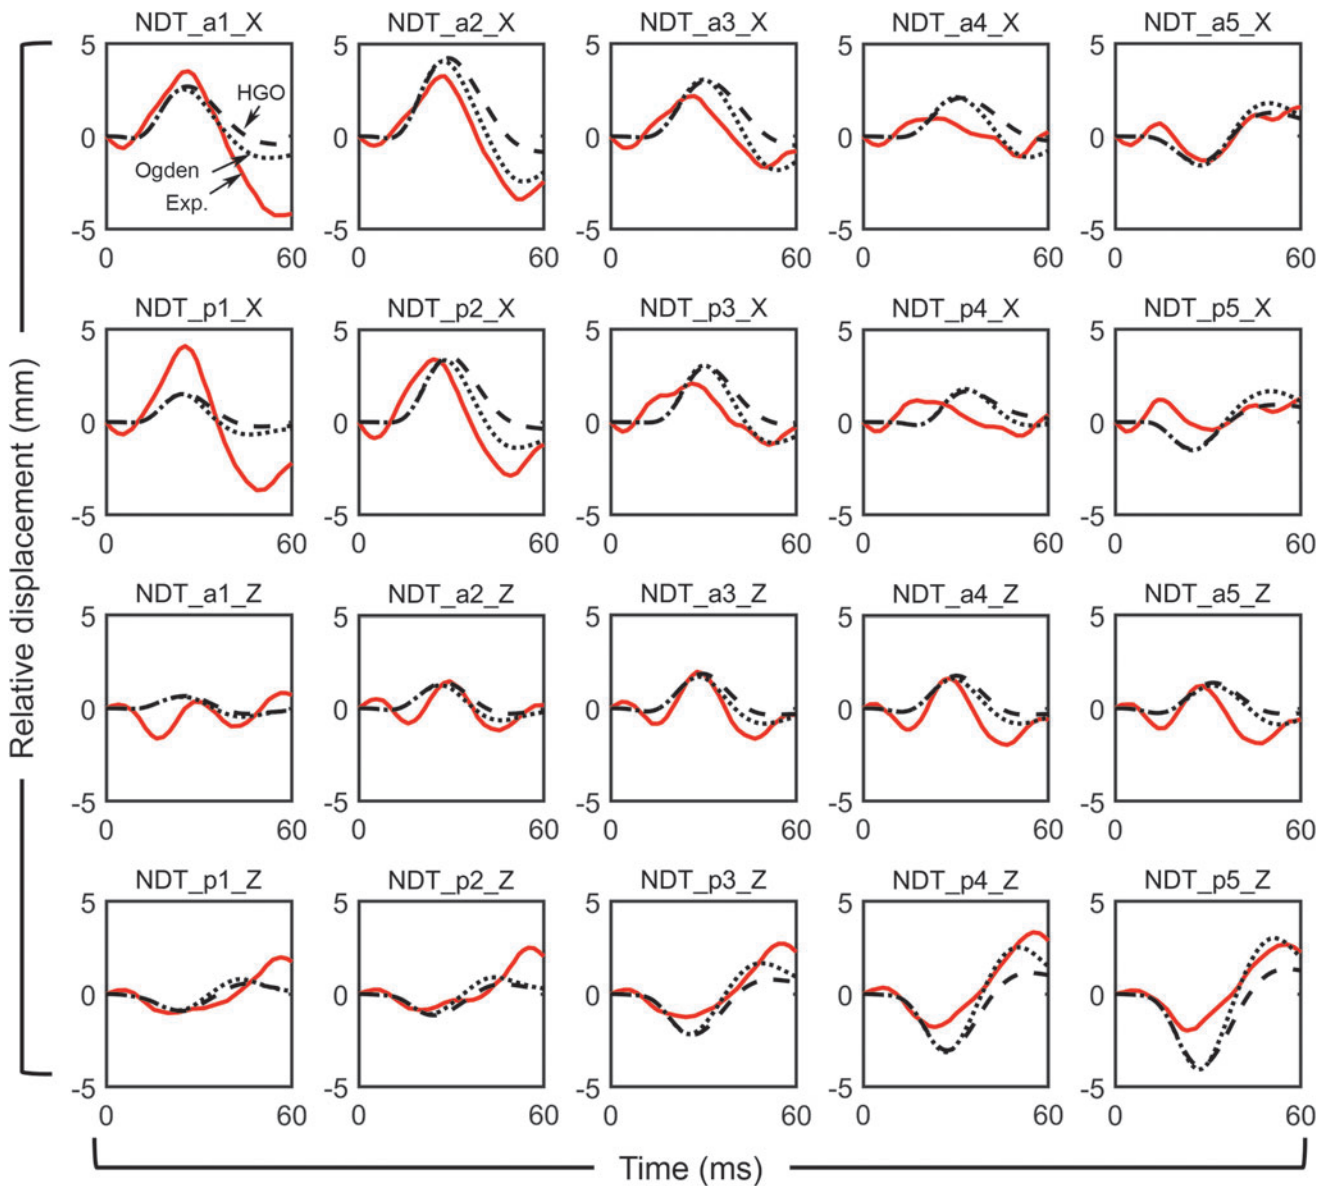

**SUPPLEMENTARY FIG. A1.** WHIM-estimated relative brain-skull displacements at each NDT location along with experimental results for C755-T2 using the HGO and Ogden material properties.

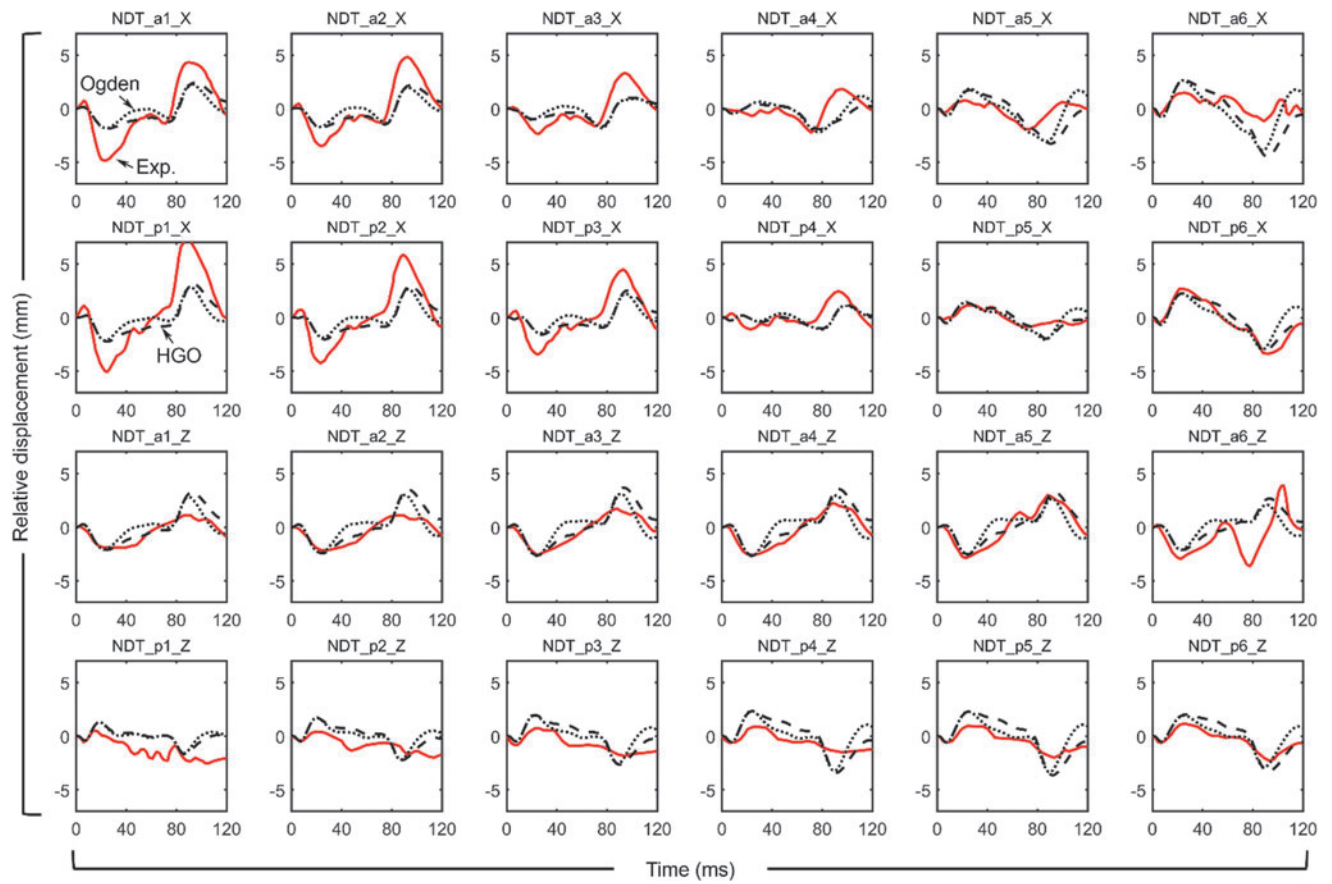

**SUPPLEMENTARY FIG. A2.** Relative brain-skull displacements comparisons for C383-T1.

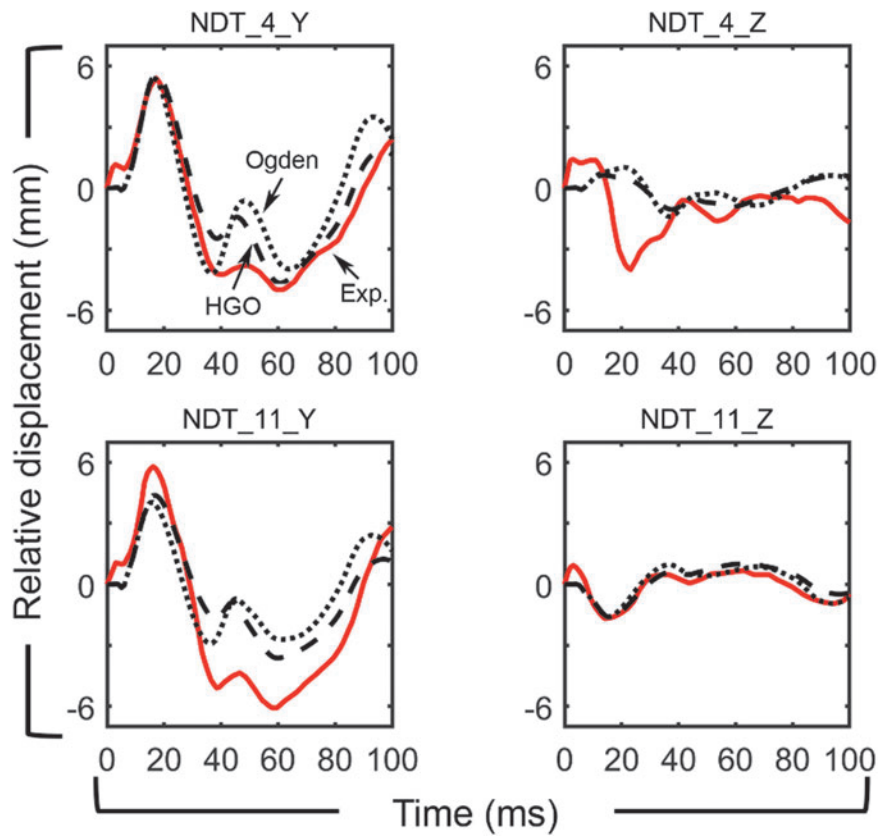

**SUPPLEMENTARY FIG. A3.** Relative brain-skull displacements comparisons for C393-T4.

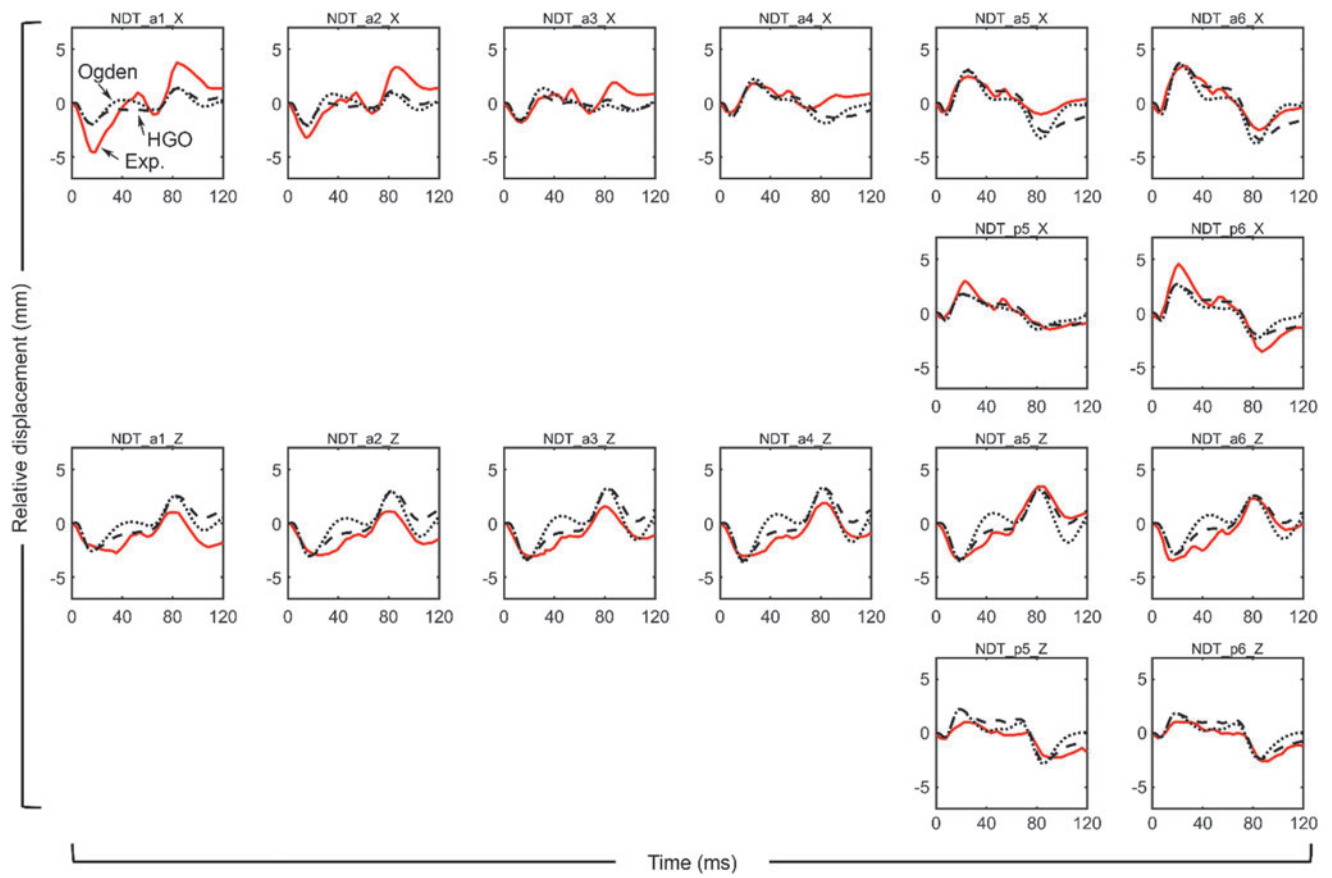

**SUPPLEMENTARY FIG. A4.** Relative brain-skull displacements comparisons for C383-T3.

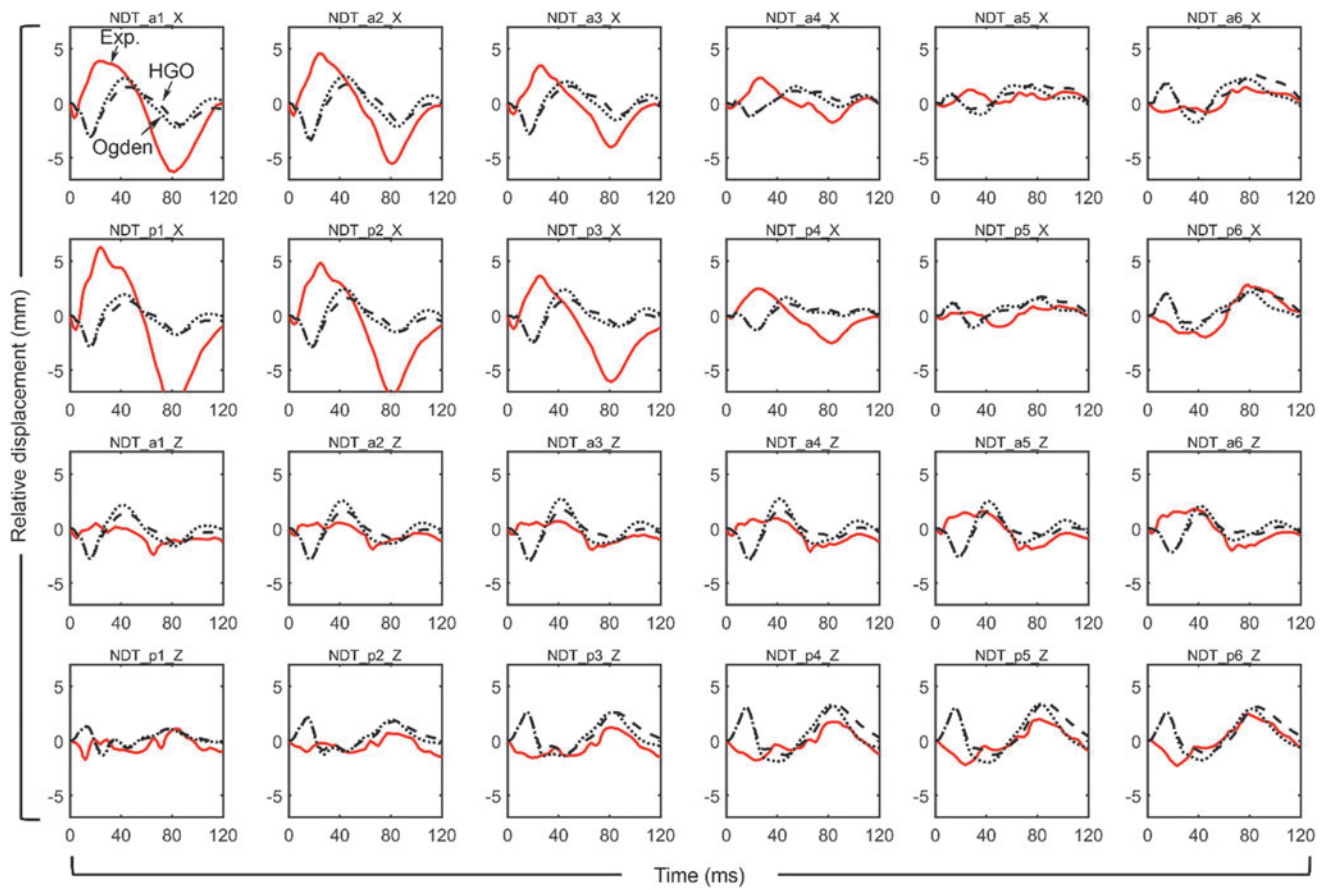

**SUPPLEMENTARY FIG. A5.** Relative brain-skull displacements comparisons for C383-T4.

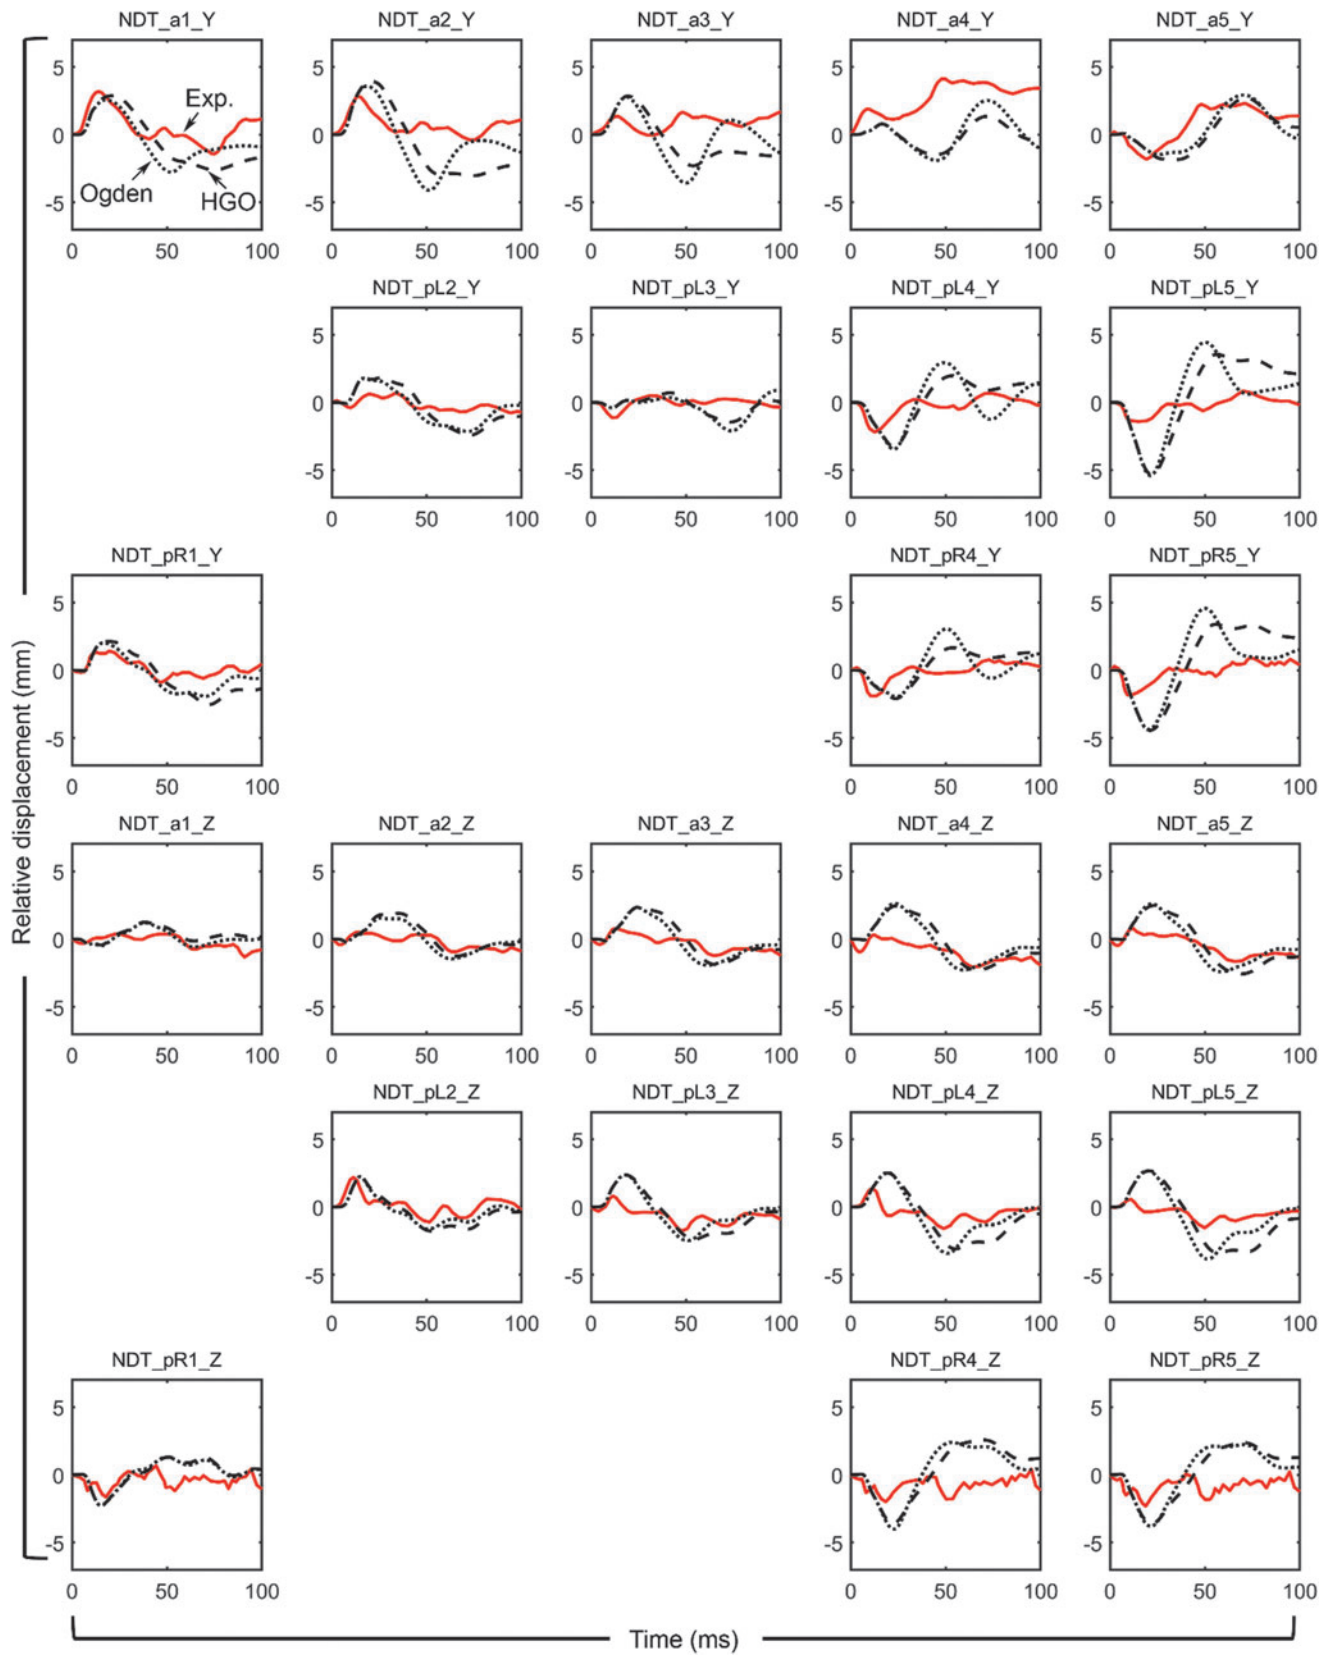

**SUPPLEMENTARY FIG. A6.** Relative brain-skull displacements comparisons for C291-T1.

SUPPLEMENTARY TABLE A1. CS AND CORA SCORES AT EACH NDT LOCATION FOR C755-T2 USING THE HGO AND OGDEN MATERIAL PROPERTIES

| C755-T2 | location | CS <sub>N</sub> – phase |       | CS <sub>N</sub> – amp |       | CS <sub>N</sub> – shape |       | Average |       | CORA  |       |
|---------|----------|-------------------------|-------|-----------------------|-------|-------------------------|-------|---------|-------|-------|-------|
|         |          | HGO                     | Ogden | HGO                   | Ogden | HGO                     | Ogden | HGO     | Ogden | HGO   | Ogden |
| X       | NDT_a1   | 95.78                   | 99.81 | 86.80                 | 82.81 | 72.86                   | 88.91 | 85.15   | 90.51 | 0.57  | 0.674 |
|         | NDT_a2   | 91.61                   | 97.61 | 99.99                 | 99.96 | 72.68                   | 95.08 | 88.10   | 97.55 | 0.446 | 0.620 |
|         | NDT_a3   | 76.94                   | 83.98 | 97.75                 | 95.92 | 84.83                   | 96.71 | 86.51   | 92.20 | 0.36  | 0.503 |
|         | NDT_a4   | 56.52                   | 70.55 | 87.59                 | 85.58 | 88.81                   | 99.34 | 77.64   | 85.16 | 0.248 | 0.323 |
|         | NDT_a5   | 96.70                   | 95.94 | 100                   | 97.79 | 93.76                   | 94.78 | 96.82   | 96.17 | 0.668 | 0.526 |
|         | NDT_p1   | 98.67                   | 99.42 | 62.05                 | 55.20 | 79.57                   | 94.99 | 80.10   | 83.20 | 0.367 | 0.483 |
|         | NDT_p2   | 72.59                   | 84.09 | 98.86                 | 97.46 | 81.14                   | 99.88 | 84.20   | 93.81 | 0.358 | 0.447 |
|         | NDT_p3   | 72.00                   | 81.82 | 97.41                 | 97.12 | 94.47                   | 99.59 | 87.96   | 92.84 | 0.341 | 0.504 |
|         | NDT_p4   | 0.00                    | 10.10 | 96.81                 | 97.23 | 87.59                   | 87.12 | 61.46   | 64.82 | 0.263 | 0.281 |
| Z       | NDT_p5   | 68.87                   | 69.48 | 99.07                 | 91.35 | 69.92                   | 85.57 | 79.29   | 82.14 | 0.373 | 0.227 |
|         | NDT_a1   | 40.50                   | 32.33 | 84.73                 | 79.77 | 57.36                   | 78.80 | 60.86   | 63.63 | 0.267 | 0.311 |
|         | NDT_a2   | 98.15                   | 92.28 | 99.24                 | 98.24 | 63.23                   | 80.29 | 86.87   | 90.27 | 0.409 | 0.444 |
|         | NDT_a3   | 95.09                   | 98.48 | 98.86                 | 97.84 | 72.63                   | 87.86 | 88.86   | 94.73 | 0.451 | 0.564 |
|         | NDT_a4   | 92.47                   | 96.28 | 97.57                 | 95.81 | 52.08                   | 73.63 | 80.71   | 88.58 | 0.366 | 0.419 |
|         | NDT_a5   | 84.42                   | 80.89 | 95.65                 | 93.47 | 43.47                   | 74.66 | 74.51   | 83.01 | 0.353 | 0.376 |
|         | NDT_p1   | 95.90                   | 76.58 | 85.09                 | 85.71 | 79.02                   | 89.77 | 86.67   | 84.02 | 0.620 | 0.426 |
|         | NDT_p2   | 98.90                   | 84.08 | 89.51                 | 88.42 | 61.65                   | 82.31 | 83.36   | 84.94 | 0.705 | 0.642 |
|         | NDT_p3   | 98.91                   | 98.17 | 98.43                 | 99.73 | 72.76                   | 84.72 | 90.03   | 94.21 | 0.586 | 0.693 |
| average | NDT_p4   | 95.98                   | 93.68 | 99.56                 | 99.78 | 73.46                   | 82.63 | 89.67   | 92.03 | 0.493 | 0.698 |
|         | NDT_p5   | 93.32                   | 97.53 | 97.51                 | 92.54 | 78.88                   | 89.54 | 89.90   | 93.20 | 0.436 | 0.591 |
| average |          | 81.17                   | 82.16 | 93.62                 | 91.59 | 74.01                   | 88.31 | 82.93   | 87.35 | 0.434 | 0.488 |

SUPPLEMENTARY TABLE A2. CS AND CORA SCORES AT EACH NDT LOCATION FOR C383-T1

| <i>C383-T1</i> | <i>location</i> | $CS_N$ - phase |              | $CS_N$ - amp |              | $CS_N$ - shape |              | <i>Average</i> |              | <i>CORA</i> |              |
|----------------|-----------------|----------------|--------------|--------------|--------------|----------------|--------------|----------------|--------------|-------------|--------------|
|                |                 | <i>HGO</i>     | <i>Ogden</i> | <i>HGO</i>   | <i>Ogden</i> | <i>HGO</i>     | <i>Ogden</i> | <i>HGO</i>     | <i>Ogden</i> | <i>HGO</i>  | <i>Ogden</i> |
| X              | NDT_a1          | 94.22          | 99.45        | 79.48        | 68.97        | 99.02          | 95.20        | 90.90          | 87.87        | 0.575       | 0.492        |
|                | NDT_a2          | 95.44          | 100          | 83.21        | 74.04        | 95.96          | 89.04        | 91.54          | 87.69        | 0.589       | 0.477        |
|                | NDT_a3          | 90.09          | 95.28        | 82.47        | 83.10        | 90.41          | 73.87        | 87.66          | 84.08        | 0.476       | 0.347        |
|                | NDT_a4          | 67.25          | 55.96        | 99.13        | 99.96        | 50.80          | 83.73        | 72.39          | 79.88        | 0.365       | 0.414        |
|                | NDT_a5          | 55.37          | 82.85        | 82.05        | 84.41        | 99.96          | 91.98        | 79.13          | 86.41        | 0.281       | 0.398        |
|                | NDT_a6          | 98.03          | 99.92        | 76.85        | 83.55        | 66.97          | 60.74        | 80.62          | 81.40        | 0.233       | 0.273        |
| Z              | NDT_p1          | 94.20          | 99.55        | 74.42        | 63.20        | 97.93          | 94.02        | 88.85          | 85.59        | 0.517       | 0.512        |
|                | NDT_p2          | 87.21          | 96.97        | 81.67        | 69.83        | 99.72          | 95.24        | 89.53          | 87.35        | 0.533       | 0.507        |
|                | NDT_p3          | 90.20          | 96.43        | 84.84        | 74.32        | 93.17          | 89.07        | 89.41          | 86.60        | 0.530       | 0.454        |
|                | NDT_p4          | 67.55          | 69.27        | 88.32        | 89.40        | 81.34          | 71.91        | 79.07          | 76.86        | 0.443       | 0.386        |
|                | NDT_p5          | 96.07          | 99.47        | 94.92        | 94.78        | 79.06          | 70.19        | 90.02          | 88.15        | 0.472       | 0.423        |
|                | NDT_p6          | 99.60          | 91.46        | 98.77        | 96.18        | 96.93          | 91.57        | 98.43          | 93.07        | 0.766       | 0.641        |
|                | NDT_a1          | 95.60          | 96.80        | 96.24        | 99.90        | 83.23          | 76.48        | 91.69          | 91.06        | 0.493       | 0.493        |
|                | NDT_a2          | 96.27          | 98.41        | 95.55        | 99.62        | 82.52          | 71.45        | 91.45          | 89.83        | 0.465       | 0.435        |
|                | NDT_a3          | 96.38          | 98.24        | 97.10        | 99.90        | 91.63          | 78.97        | 95.04          | 92.37        | 0.609       | 0.497        |
|                | NDT_a4          | 96.62          | 98.10        | 99.69        | 99.48        | 94.79          | 80.77        | 97.03          | 92.78        | 0.642       | 0.486        |
|                | NDT_a5          | 96.13          | 98.62        | 99.42        | 96.61        | 97.80          | 82.00        | 97.78          | 92.41        | 0.683       | 0.504        |
|                | NDT_a6          | 86.49          | 48.64        | 95.68        | 86.20        | 58.86          | 86.18        | 80.35          | 73.67        | 0.312       | 0.208        |
|                | NDT_p1          | 97.49          | 95.58        | 89.30        | 89.16        | 35.99          | 32.08        | 74.26          | 72.27        | 0.289       | 0.297        |
|                | NDT_p2          | 100            | 100          | 99.93        | 99.52        | 41.89          | 27.56        | 80.61          | 75.69        | 0.337       | 0.362        |
|                | NDT_p3          | 100            | 93.20        | 99.34        | 99.99        | 62.27          | 57.19        | 87.20          | 83.46        | 0.267       | 0.371        |
|                | NDT_p4          | 100            | 89.86        | 89.57        | 95.06        | 71.10          | 67.60        | 86.89          | 84.17        | 0.226       | 0.328        |
|                | NDT_p5          | 99.24          | 95.14        | 87.40        | 95.18        | 84.42          | 78.60        | 90.35          | 89.64        | 0.345       | 0.520        |
|                | NDT_p6          | 98.92          | 94.56        | 90.82        | 98.25        | 91.53          | 88.85        | 93.76          | 93.89        | 0.436       | 0.639        |
| average        |                 | 91.60          | 91.41        | 90.26        | 89.19        | 81.14          | 76.43        | 87.66          | 85.68        | 0.454       | 0.436        |



SUPPLEMENTARY TABLE A3. CS AND CORA SCORES AT EACH NDT LOCATION FOR C393-T4

| <i>C393-T4</i> | <i>location</i> | $CS_N$ - phase |              | $CS_N$ - amp |              | $CS_N$ - shape |              | <i>Average</i> |              | <i>CORA</i> |              |
|----------------|-----------------|----------------|--------------|--------------|--------------|----------------|--------------|----------------|--------------|-------------|--------------|
|                |                 | <i>HGO</i>     | <i>Ogden</i> | <i>HGO</i>   | <i>Ogden</i> | <i>HGO</i>     | <i>Ogden</i> | <i>HGO</i>     | <i>Ogden</i> | <i>HGO</i>  | <i>Ogden</i> |
| y              | NDT_4           | 99.29          | 100.00       | 98.92        | 98.90        | 96.13          | 86.08        | 98.11          | 94.99        | 0.728       | 0.559        |
|                | NDT_11          | 60.08          | 38.19        | 70.57        | 74.50        | 82.74          | 87.17        | 71.13          | 66.62        | 0.535       | 0.404        |
| Z              | NDT_4           | 99.36          | 100.00       | 87.29        | 84.62        | 95.40          | 86.87        | 94.02          | 90.50        | 0.406       | 0.379        |
|                | NDT_11          | 99.44          | 99.76        | 99.94        | 99.96        | 84.86          | 89.16        | 94.74          | 96.29        | 0.592       | 0.646        |
| average        |                 | 89.54          | 84.49        | 89.18        | 89.49        | 89.78          | 87.32        | 89.50          | 87.10        | 0.565       | 0.497        |

SUPPLEMENTARY TABLE A4. CS AND CORA SCORES AT EACH NDT LOCATION FOR C383-T3

| C383-T3 | location | CS <sub>N</sub> – phase |        | CS <sub>N</sub> – amp |       | CS <sub>N</sub> – shape |       | Average |       | CORA  |       |       |
|---------|----------|-------------------------|--------|-----------------------|-------|-------------------------|-------|---------|-------|-------|-------|-------|
|         |          | HGO                     | Ogden  | HGO                   | Ogden | HGO                     | Ogden | HGO     | Ogden | HGO   | Ogden |       |
| X       | NDT_a1   | 99.54                   | 97.44  | 71.14                 | 67.11 | 90.04                   | 88.23 | 86.91   | 84.26 | 0.476 | 0.492 |       |
|         | NDT_a2   | 98.84                   | 97.56  | 75.56                 | 84.34 | 83.71                   | 61.15 | 86.04   | 81.02 | 0.475 | 0.389 |       |
|         | NDT_a3   | 73.37                   | 34.89  | 87.77                 | 95.99 | 74.31                   | 99.76 | 78.48   | 76.88 | 0.383 | 0.422 |       |
|         | NDT_a4   | 97.49                   | 97.14  | 99.56                 | 98.74 | 41.61                   | 54.31 | 79.55   | 83.40 | 0.623 | 0.498 |       |
|         | NDT_a5   | 96.33                   | 100    | 93.26                 | 95.52 | 85.04                   | 84.15 | 91.54   | 93.22 | 0.584 | 0.512 |       |
|         | NDT_a6   | 98.42                   | 98.78  | 97.77                 | 99.93 | 96.56                   | 93.56 | 97.59   | 97.42 | 0.74  | 0.703 |       |
|         | NDT_p1   | N/A                     | N/A    | N/A                   | N/A   | N/A                     | N/A   | N/A     | N/A   | N/A   | N/A   |       |
|         | NDT_p2   |                         |        |                       |       |                         |       |         |       |       |       |       |
|         | NDT_p3   |                         |        |                       |       |                         |       |         |       |       |       |       |
|         | NDT_p4   |                         |        |                       |       |                         |       |         |       |       |       |       |
|         | NDT_p5   | 99.93                   | 98.06  | 97.49                 | 96.02 | 96.06                   | 95.83 | 97.83   | 96.64 | 0.761 | 0.723 |       |
|         | NDT_p6   | 99.88                   | 98.53  | 93.24                 | 87.58 | 97.67                   | 96.37 | 96.93   | 94.16 | 0.722 | 0.625 |       |
| Z       | NDT_a1   | 98.09                   | 99.67  | 99.46                 | 97.43 | 56.83                   | 59.61 | 84.79   | 85.57 | 0.534 | 0.367 |       |
|         | NDT_a2   | 99.41                   | 97.28  | 99.90                 | 99.17 | 65.46                   | 67.20 | 88.26   | 87.89 | 0.533 | 0.384 |       |
|         | NDT_a3   | 99.23                   | 97.13  | 99.99                 | 99.92 | 76.28                   | 72.95 | 91.83   | 90.00 | 0.562 | 0.432 |       |
|         | NDT_a4   | 99.05                   | 95.27  | 100                   | 99.98 | 82.12                   | 76.97 | 93.72   | 90.74 | 0.568 | 0.45  |       |
|         | NDT_a5   | 99.24                   | 100.00 | 98.23                 | 98.45 | 98.51                   | 74.19 | 98.66   | 90.88 | 0.757 | 0.494 |       |
|         | NDT_a6   | 99.72                   | 97.94  | 97.26                 | 96.82 | 90.45                   | 73.36 | 95.81   | 89.37 | 0.637 | 0.412 |       |
|         |          | NDT_p1                  | N/A    | N/A                   | N/A   | N/A                     | N/A   | N/A     | N/A   | N/A   | N/A   | N/A   |
|         |          | NDT_p2                  |        |                       |       |                         |       |         |       |       |       |       |
|         |          | NDT_p3                  |        |                       |       |                         |       |         |       |       |       |       |
|         |          | NDT_p4                  |        |                       |       |                         |       |         |       |       |       |       |
|         |          | NDT_p5                  | 97.17  | 89.70                 | 98.68 | 100                     | 83.77 | 79.62   | 93.21 | 89.77 | 0.433 | 0.506 |
|         | NDT_p6   | 99.49                   | 94.19  | 99.79                 | 99.01 | 88.51                   | 87.86 | 95.93   | 93.69 | 0.594 | 0.639 |       |
| average |          | 97.20                   | 93.35  | 94.32                 | 94.75 | 81.68                   | 79.07 | 91.07   | 89.06 | 0.586 | 0.503 |       |

SUPPLEMENTARY TABLE A5. CS AND CORA SCORES AT EACH NDT LOCATION FOR C383-T4

| <i>C383-T4</i> | <i>location</i> | $CS_N$ - phase |              | $CS_N$ - amp |              | $CS_N$ - shape |              | <i>Average</i> |              | <i>CORA</i> |              |
|----------------|-----------------|----------------|--------------|--------------|--------------|----------------|--------------|----------------|--------------|-------------|--------------|
|                |                 | <i>HGO</i>     | <i>Ogden</i> | <i>HGO</i>   | <i>Ogden</i> | <i>HGO</i>     | <i>Ogden</i> | <i>HGO</i>     | <i>Ogden</i> | <i>HGO</i>  | <i>Ogden</i> |
| X              | NDT_a1          | 66.86          | 92.56        | 70.35        | 83.65        | 86.41          | 58.34        | 74.54          | 78.18        | 0.262       | 0.292        |
|                | NDT_a2          | 48.01          | 79.80        | 77.48        | 89.33        | 86.15          | 60.12        | 70.54          | 76.41        | 0.264       | 0.288        |
|                | NDT_a3          | 24.29          | 61.13        | 82.06        | 91.87        | 94.55          | 70.71        | 66.97          | 74.57        | 0.254       | 0.269        |
|                | NDT_a4          | 2.94           | 18.96        | 95.87        | 95.77        | 63.78          | 66.82        | 54.20          | 60.52        | 0.261       | 0.28         |
|                | NDT_a5          | 75.01          | 50.82        | 94.26        | 96.66        | 86.20          | 83.74        | 85.16          | 77.07        | 0.285       | 0.248        |
|                | NDT_a6          | 97.61          | 80.80        | 89.16        | 90.54        | 72.72          | 80.76        | 86.50          | 84.03        | 0.291       | 0.279        |
| Z              | NDT_p1          | 80.73          | 97.76        | 55.93        | 73.76        | 79.62          | 51.45        | 72.09          | 74.32        | 0.246       | 0.268        |
|                | NDT_p2          | 64.45          | 86.73        | 63.67        | 80.67        | 82.27          | 52.72        | 70.13          | 73.37        | 0.264       | 0.292        |
|                | NDT_p3          | 57.76          | 78.32        | 68.93        | 84.95        | 72.36          | 45.82        | 66.35          | 69.70        | 0.246       | 0.243        |
|                | NDT_p4          | 18.39          | 38.32        | 85.65        | 90.63        | 54.46          | 48.88        | 52.83          | 59.28        | 0.22        | 0.221        |
|                | NDT_p5          | 73.35          | 30.33        | 89.92        | 91.67        | 82.39          | 98.93        | 81.89          | 73.65        | 0.201       | 0.241        |
|                | NDT_p6          | 95.79          | 96.01        | 98.56        | 96.58        | 75.40          | 71.11        | 89.92          | 87.90        | 0.447       | 0.357        |
|                | NDT_a1          | 81.20          | 95.41        | 99.74        | 98.94        | 51.42          | 34.74        | 77.45          | 76.36        | 0.296       | 0.282        |
|                | NDT_a2          | 70.62          | 97.57        | 97.04        | 94.95        | 58.35          | 39.24        | 75.33          | 77.25        | 0.348       | 0.298        |
|                | NDT_a3          | 74.65          | 98.91        | 98.94        | 96.69        | 51.59          | 37.15        | 75.06          | 77.58        | 0.33        | 0.312        |
|                | NDT_a4          | 82.65          | 94.85        | 99.94        | 98.14        | 38.68          | 38.97        | 73.76          | 77.32        | 0.319       | 0.299        |
|                | NDT_a5          | 86.40          | 94.95        | 99.55        | 99.93        | 23.10          | 32.14        | 69.68          | 75.67        | 0.319       | 0.329        |
|                | NDT_a6          | 70.69          | 93.07        | 97.55        | 99.67        | 34.31          | 30.18        | 67.52          | 74.30        | 0.282       | 0.327        |
|                | NDT_p1          | 34.21          | 36.20        | 99.02        | 99.34        | 74.04          | 68.67        | 69.09          | 68.07        | 0.294       | 0.293        |
|                | NDT_p2          | 30.55          | 82.13        | 96.02        | 97.69        | 79.72          | 36.86        | 68.76          | 72.23        | 0.262       | 0.212        |
|                | NDT_p3          | 95.91          | 71.22        | 99.11        | 97.31        | 22.04          | 60.28        | 72.35          | 76.27        | 0.256       | 0.272        |
|                | NDT_p4          | 100            | 98.20        | 95.54        | 95.05        | 38.74          | 42.02        | 78.09          | 78.42        | 0.266       | 0.312        |
|                | NDT_p5          | 89.74          | 100.00       | 94.98        | 96.01        | 55.94          | 49.73        | 80.22          | 81.92        | 0.314       | 0.347        |
|                | NDT_p6          | 79.62          | 93.09        | 98.28        | 99.11        | 75.98          | 65.66        | 84.63          | 85.95        | 0.375       | 0.442        |
| average        |                 | 66.73          | 77.80        | 89.48        | 93.29        | 64.18          | 55.21        | 73.46          | 75.43        | 0.288       | 0.292        |

SUPPLEMENTARY TABLE A6. CS AND CORA SCORES AT EACH NDT LOCATION FOR C291-T1

| <i>C291-T1</i> | <i>location</i> | <i>CS<sub>N</sub> – phase</i> |              | <i>CS<sub>N</sub> – amp</i> |              | <i>CS<sub>N</sub> – shape</i> |              | <i>Average</i> |              | <i>CORA</i> |              |       |
|----------------|-----------------|-------------------------------|--------------|-----------------------------|--------------|-------------------------------|--------------|----------------|--------------|-------------|--------------|-------|
|                |                 | <i>HGO</i>                    | <i>Ogden</i> | <i>HGO</i>                  | <i>Ogden</i> | <i>HGO</i>                    | <i>Ogden</i> | <i>HGO</i>     | <i>Ogden</i> | <i>HGO</i>  | <i>Ogden</i> |       |
| Y              | NDT_a1          | 88.91                         | 96.41        | 97.77                       | 98.42        | 67.59                         | 44.66        | 84.76          | 79.83        | 0.463       | 0.373        |       |
|                | NDT_a2          | 93.57                         | 0.00         | 99.90                       | 96.07        | 25.46                         | 84.16        | 72.97          | 60.08        | 0.377       | 0.131        |       |
|                | NDT_a3          | 88.23                         | 87.53        | 98.19                       | 96.17        | 43.83                         | 49.50        | 76.75          | 77.73        | 0.253       | 0.239        |       |
|                | NDT_a4          | 83.78                         | 92.19        | 93.65                       | 91.46        | 66.51                         | 61.92        | 81.31          | 81.86        | 0.206       | 0.213        |       |
|                | NDT_a5          | 89.75                         | 96.24        | 99.90                       | 96.86        | 96.69                         | 96.12        | 95.45          | 96.41        | 0.615       | 0.687        |       |
|                | NDT_pL2         | 99.18                         | 71.05        | 95.36                       | 87.35        | 66.15                         | 82.73        | 86.90          | 80.37        | 0.403       | 0.342        |       |
|                | NDT_pL3         | 77.06                         | 71.51        | 52.14                       | 47.96        | 72.96                         | 82.25        | 67.39          | 67.24        | 0.163       | 0.204        |       |
|                | NDT_pL4         | 92.50                         | 89.49        | 60.29                       | 64.40        | 66.37                         | 63.98        | 73.05          | 72.62        | 0.169       | 0.165        |       |
|                | NDT_pL5         | 100.00                        | 99.80        | 82.54                       | 89.76        | 62.72                         | 58.65        | 81.75          | 82.73        | 0.237       | 0.271        |       |
|                | NDT_pR1         | 92.58                         | 96.06        | 69.51                       | 73.50        | 81.89                         | 85.55        | 81.33          | 85.04        | 0.278       | 0.33         |       |
|                | NDT_pR4         | 96.01                         | 92.76        | 63.61                       | 72.50        | 64.50                         | 56.78        | 74.71          | 74.01        | 0.091       | 0.08         |       |
|                | NDT_pR5         | 98.13                         | 98.48        | 67.34                       | 74.87        | 64.68                         | 65.23        | 76.72          | 79.53        | 0.224       | 0.224        |       |
|                | Z               | NDT_a1                        | 98.21        | 95.33                       | 93.96        | 94.69                         | 54.71        | 52.80          | 82.29        | 80.94       | 0.283        | 0.287 |
|                |                 | NDT_a2                        | 81.26        | 85.77                       | 93.15        | 93.05                         | 45.47        | 43.50          | 73.29        | 74.11       | 0.284        | 0.254 |
|                |                 | NDT_a3                        | 99.98        | 99.09                       | 94.13        | 93.97                         | 80.06        | 74.94          | 91.39        | 89.33       | 0.431        | 0.412 |
| NDT_a4         |                 | 99.81                         | 99.62        | 97.18                       | 96.81        | 66.92                         | 63.83        | 87.97          | 86.76        | 0.336       | 0.335        |       |
| NDT_a5         |                 | 99.78                         | 99.15        | 97.56                       | 93.77        | 88.19                         | 85.09        | 95.18          | 92.67        | 0.555       | 0.602        |       |
| NDT_pL2        |                 | 84.82                         | 94.33        | 82.30                       | 86.81        | 76.17                         | 68.59        | 81.10          | 83.24        | 0.269       | 0.27         |       |
| NDT_pL3        |                 | 88.61                         | 94.10        | 81.49                       | 85.36        | 87.81                         | 79.00        | 85.97          | 86.15        | 0.326       | 0.375        |       |
| NDT_pL4        |                 | 82.12                         | 89.81        | 82.96                       | 86.76        | 93.61                         | 86.94        | 86.23          | 87.84        | 0.323       | 0.321        |       |
| NDT_pL5        |                 | 63.24                         | 79.02        | 99.70                       | 99.78        | 87.44                         | 81.29        | 83.46          | 86.69        | 0.386       | 0.445        |       |
| NDT_pR1        |                 | 93.80                         | 87.71        | 99.21                       | 91.45        | 1.73                          | 21.59        | 64.91          | 66.92        | 0.181       | 0.201        |       |
| NDT_pR4        |                 | 82.99                         | 69.92        | 90.24                       | 87.58        | 29.26                         | 43.92        | 67.50          | 67.14        | 0.192       | 0.206        |       |
| NDT_pR5        |                 | 88.48                         | 65.55        | 98.52                       | 98.98        | 17.56                         | 39.50        | 68.18          | 68.01        | 0.264       | 0.318        |       |
| average        |                 |                               | 90.12        | 85.45                       | 87.11        | 87.43                         | 62.84        | 65.52          | 80.02        | 79.47       | 0.305        | 0.304 |

SUPPLEMENTARY TABLE A7. CORA SCORES AND RANKS AS COMPARED TO FIVE OTHER HEAD INJURY MODELS FOR THE SELECTED CADAVERIC IMPACTS. AMONG THOSE HAVING BEEN VALIDATED AGAINST THE SAME SET OF IMPACTS (SHADED AREA, CORA SCORES DRAWN FROM THE LITERATURE<sup>43</sup>), BOTH VERSIONS OF WHIM RANKED THE HIGHEST CORA SCORES, ALTHOUGH THE ANISOTROPIC VERSION HAD A SLIGHTLY HIGHER VALUE

|              | <i>C755-T2</i><br>(N=10; 60ms) | <i>C383-T1</i><br>(N=12, 120ms) | <i>C291-T1</i><br>(N=12,<br>100ms) | <i>C383-T3</i><br>(N=8; 120ms) | <i>C383-T4</i><br>(N=12; 120ms) | <i>C393-T4</i><br>(N=2; 100ms) | Rank          |
|--------------|--------------------------------|---------------------------------|------------------------------------|--------------------------------|---------------------------------|--------------------------------|---------------|
| WHIM (HGO)   | 0.434                          | 0.454                           | 0.295                              | 0.586                          | 0.288                           | 0.565                          | 3, 1, 3, 1, 5 |
| WHIM (Ogden) | 0.488                          | 0.436                           | 0.310                              | 0.503                          | 0.292                           | 0.497                          | 1, 2, 4, 2, 4 |
| ABM          | 0.449                          | 0.393                           | 0.385                              | 0.306                          | 0.347                           | -                              | 2, 4, 2, 3, 3 |
| SIMon        | 0.340                          | 0.412                           | 0.388                              | 0.209                          | 0.423                           | -                              | 5, 3, 1, 5, 1 |
| GHBMC        | 0.433                          | 0.352                           | 0.221                              | 0.232                          | 0.378                           | 0.322* <sup>▲,■,○,75</sup>     | 4, 5, 6, 4, 2 |
| THUMS        | 0.313                          | 0.306                           | 0.246                              | 0.186                          | 0.251                           | 0.319* <sup>▲,■,○,75</sup>     | 6, 6, 5, 6, 6 |
| KTH (M-R)    | 0.475 <sup>43</sup>            | 0.407 <sup>43</sup>             | 0.358** <sup>, 43</sup>            | N/A                            | 0.445* <sup>,○,68</sup>         | -                              | N/A           |
| KTH (Ogden)  | 0.390 <sup>◆,43</sup>          | 0.256 <sup>43</sup>             | 0.389** <sup>,43</sup>             | N/A                            | N/A                             | 0.460* <sup>▲,■,○,75</sup>     | N/A           |
| KTH (HGO) ○  | 0.480 <sup>◆, 29</sup>         | 0.312*** <sup>,◆, 29</sup>      | 0.356** <sup>,◆, 29</sup>          | N/A                            | N/A                             | 0.574* <sup>▲,■, 75</sup>      | N/A           |

\* N=6

\*\* N=9

\*\*\* N=10

▲ First 40 ms

◆ First 50 ms

■ Along x, y and z directions

○ Calculated from digitization of published curves

SUPPLEMENTARY TABLE A8. CS AND CORA SCORES OF ABOVE-THRESHOLD AREA FRACTIONS OF THE  
 RADIAL-CIRCUMFERENTIAL SHEAR STRAINS FOR THE TWO VERSION OF WHIM USING EITHER HGO OR ODGEN  
 MATERIAL PROPERTIES FOR THE BRAIN

| <i>Threshold</i> | $CS_N - \text{phase}$ |              | $CS_N - \text{amp}$ |              | $CS_N - \text{shape}$ |              | <i>Average CS</i> |              | <i>CORA</i> |              |
|------------------|-----------------------|--------------|---------------------|--------------|-----------------------|--------------|-------------------|--------------|-------------|--------------|
|                  | <i>HGO</i>            | <i>Ogden</i> | <i>HGO</i>          | <i>Ogden</i> | <i>HGO</i>            | <i>Ogden</i> | <i>HGO</i>        | <i>Ogden</i> | <i>HGO</i>  | <i>Ogden</i> |
| 0.02             | 86.90                 | 96.64        | 90.79               | 90.60        | 92.13                 | 98.25        | 89.94             | 95.16        | 0.712       | 0.547        |
| 0.04             | 95.10                 | 95.88        | 61.19               | 85.90        | 96.97                 | 99.89        | 84.42             | 93.89        | 0.386       | 0.466        |
| 0.06             | 92.13                 | 48.97        | 96.97               | 92.15        | 97.91                 | 99.97        | 95.67             | 80.36        | 0.428       | 0.330        |
| Average          | 91.38                 | 80.50        | 82.98               | 89.55        | 95.67                 | 99.37        | 90.01             | 89.80        | 0.509       | 0.448        |
